# Supplementary material
Source: PubMed Central journal article supplement (PMC5579343)
Supplement: EMBJ-36-2544-s001.pdf [file EMBJ-36-2544-s001.pdf]

## Appendix

### **STUB1 Regulates TFEB-Induced Autophagy-Lysosome Pathway**

Youbao Sha<sup>1</sup>, Lang Rao<sup>1</sup>, Carmine Settembre<sup>3</sup>, Andrea Ballabio<sup>2,3</sup>, and N. Tony Eissa<sup>1\*</sup>

<sup>1</sup>Department of Medicine, <sup>2</sup>Department of Molecular Genetics, Baylor College of Medicine, Houston, TX, USA. <sup>3</sup>Telethon Institute of Genetics and Medicine, Pozzuoli (Naples), Italy.

\* Address correspondence to:

N. Tony Eissa, M.D., Baylor College of Medicine, One Baylor Plaza, BCM 285 Suite 535E, Houston, TX 77030. Tel: (713) 798-3657; Fax: (713) 798-2050; E-mail: [teissa@bcm.edu](mailto:teissa@bcm.edu)

## **Table of Contents**

| Item                                              | Page |
|---------------------------------------------------|------|
| Title Page                                        | 1    |
| Table of Contents                                 | 2    |
| Appendix Supplementary Figures and Figure Legends | 3-5  |

## Appendix Supplementary Figures

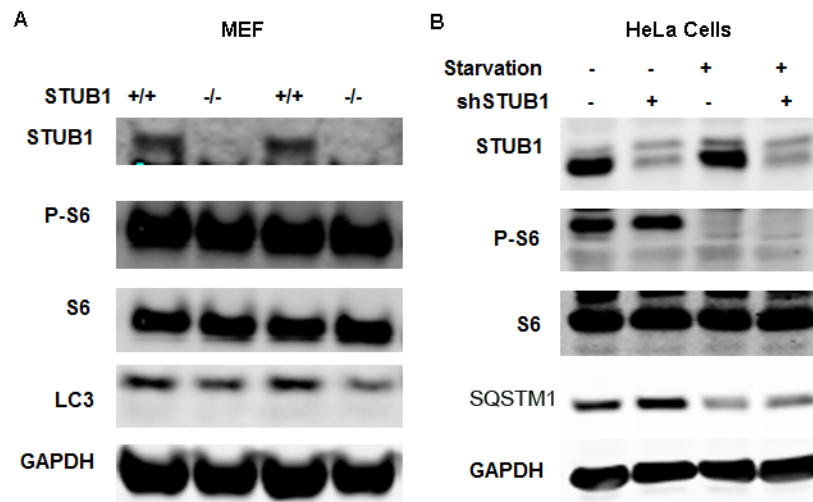

### Appendix Figure S1. mTOR signal pathway is not affected by STUB1 deficiency.

(A) MEF cells from wild type (+/+) or STUB1<sup>-/-</sup> mice were analyzed by Western blot analysis using indicated antibodies. (B) HeLa cells stably expressing control shRNA or STUB1 specific shRNA were mock-treated or treated by starvation. Cell lysates were then analyzed by Western blot using indicated antibodies.

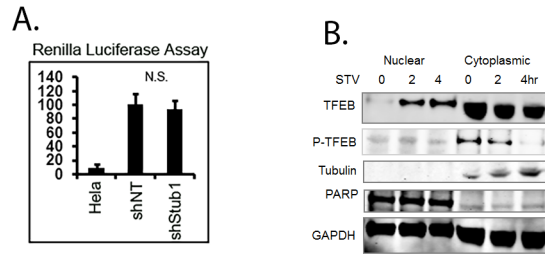

**Appendix Figure S2. A. STUB1 deficiency reduced TFEB activity.** HeLa cells, stably expressing shNT or shSTUB1, were transfected for 24 hr with a Renilla luciferase vector and luciferase activity was analyzed. N.S. denotes non significant. **B. Starvation increases nuclear translocation of non-phosphorylated TFEB.** HeLa cells were mock-treated or starved for 2 or 4 hr. Cell lysates, were then fractionated into nuclear and cytoplasmic fractions and were analyzed by Western blot. Data are representative of three independent experiments

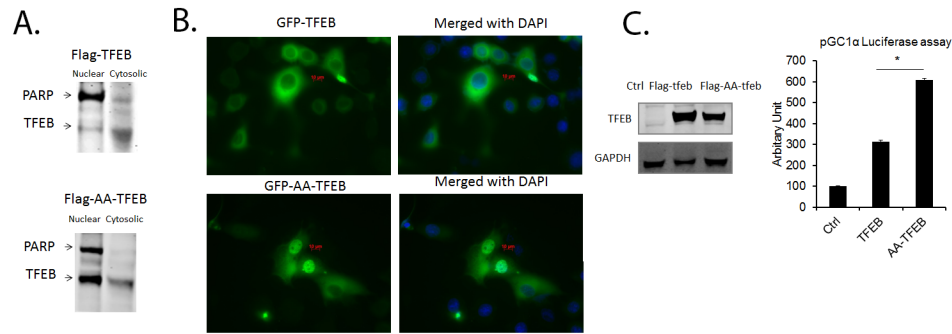

**Appendix Figure S3. Non-phosphorylatable TFEB (Ala-TFEB) have increased translocation to the nucleus and activity towards PGC1 $\alpha$  promoter.** HeLa cells were transfected, for 48 hr, with Flag-TFEB or TFEB-S142A/S211A nonphosphorylatable mutant (Flag-AA-TFEB). Cell lysates, were then fractionated into nuclear and cytoplasmic fractions and were analyzed by Western blot (**A**) or by fluorescence microscopy (**B**). HeLa cells stably expressing Flag-TFEB or Flag-AA-TFEB were co-transfected for 48 hr with PGC1 $\alpha$ -Luciferase and Luciferase activity assay was performed (**C**). \*Denotes  $p < 0.05$  using student t-test analysis. Data are representative of three independent experiments
