# Supplementary material
Source: PubMed Central journal article supplement (PMC5579343)
Supplement: EMBJ-36-2544-s002.pdf [file EMBJ-36-2544-s002.pdf]

## Expanded View Figures

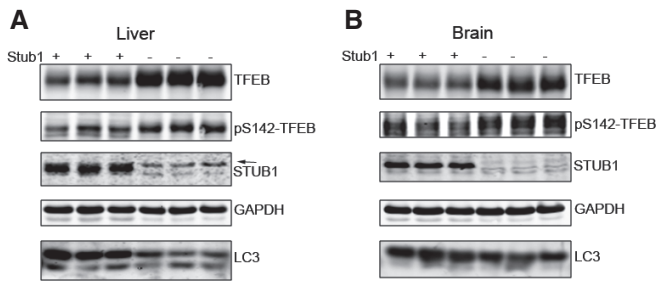

**Figure EV1. Accumulation of TFEB in STUB1 knockout mice.**

A, B Liver (A) and brain (B) tissues from wild-type (+/+) or STUB1<sup>-/-</sup> mice were analyzed by Western blot analysis using indicated antibodies. Arrow denotes a previously described non-specific band (Sha et al, 2009).

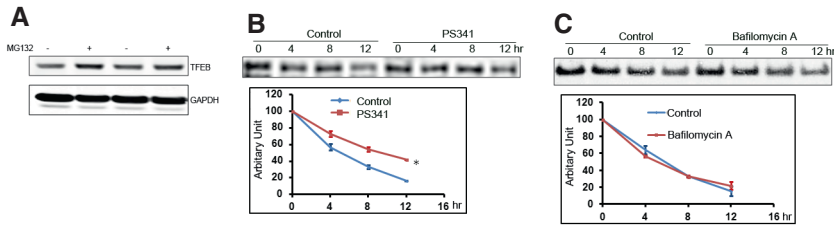

**Figure EV2. TFEB is predominantly degraded by proteasome.**

A HeLa cells were treated for 2 h with proteasome inhibitor MG132 (50  $\mu$ M), and cell lysates were analyzed by Western blot.  
 B, C HeLa cells were mock-treated or treated with proteasome inhibitor PS341 (10  $\mu$ M; B), or the lysosome inhibitor bafilomycin (10  $\mu$ M; C), and TFEB half-life was measured using pulse-chase analysis. Data are mean  $\pm$  SD,  $n = 3$ . \* denotes  $P < 0.05$  using two-way ANOVA.

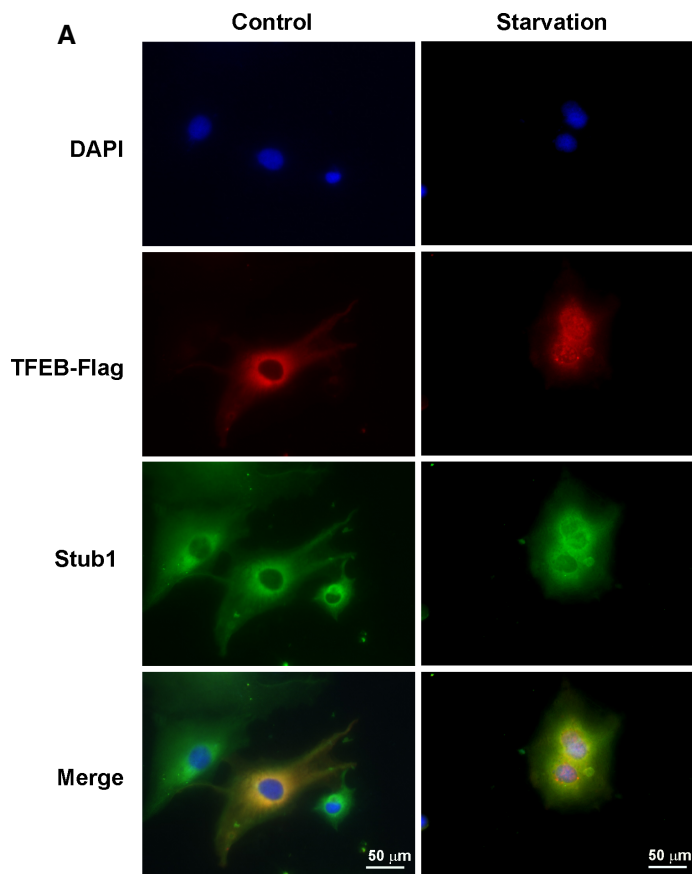

**Figure EV3. STUB1 regulates TFEB and mitochondrial respiration.**

A TFEB colocalizes with STUB1 in cytosol. HeLa cells stably expressing Flag-TFEB were mock-treated or starved for 2 h and analyzed by immunofluorescence using Flag or Stub1 antibodies. Scale bar, 20  $\mu\text{m}$ .

B STUB1 deficiency reduced mitochondrial biogenesis. Wild-type (+/+) or STUB1<sup>-/-</sup> MEFs were subjected to mitochondrial respiration analysis.

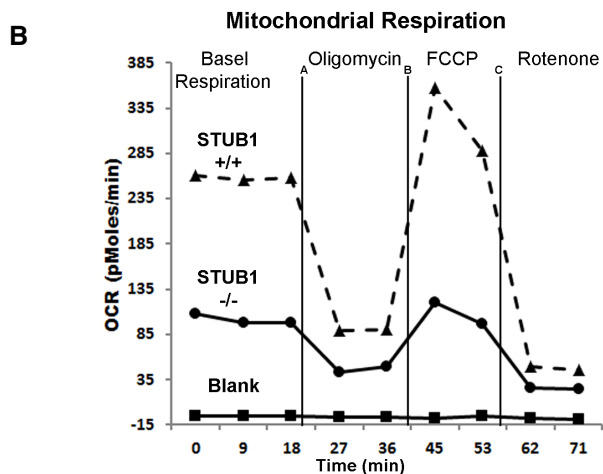

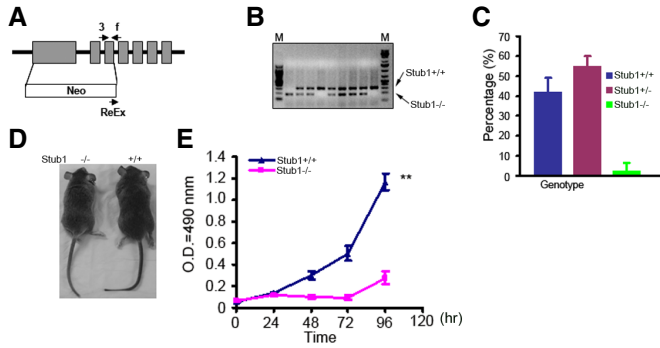

**Figure EV4. STUB1 knockout mice exhibit partial neonatal lethality.**

A Schematic diagram of generating STUB1 knockout (-/-) mice. Arrows denotes the primers used for genotyping the transgenic mice.

B Genotyping of STUB1<sup>-/-</sup> mice using PCR.

C Homozygous STUB1 knockout mice are significantly lower than the expected Mendelian inheritance.

D STUB1<sup>-/-</sup> mice are smaller than wild-type (+/+) mice.

E Proliferation assay of MEFs from STUB1<sup>-/-</sup> and +/+ mice.

Data information: Data are mean ± SD, n = 3 (C) or 6 (E). \*\* denotes P < 0.01, using Student's t-test analysis.

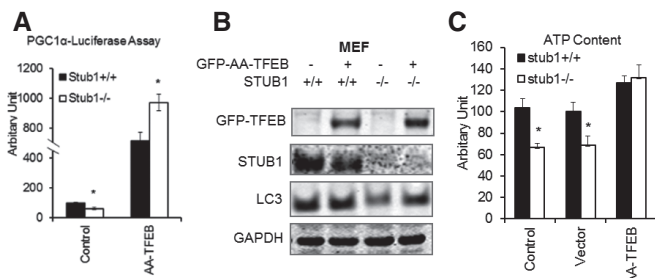

**Figure EV5. Overexpression of the non-phosphorylatable TFEB mutant rescues autophagy and mitochondrial biogenesis in STUB1 knockout MEFs.**

MEF cells from wild-type (+/+) or STUB1<sup>-/-</sup> mice were used.

A MEFs were transfected for 24 h with vector only (control) or TFEB-S142A/S211A mutant (GFP-AA-TFEB) and then transfected for another 24 h with PGC1α promoter-luciferase before luciferase activity was analyzed.

B MEFs were transfected for 48 h with vector only or GFP-AA-TFEB, and cell lysates were analyzed by Western blot.

C MEFs were treated with transfection reagent only (control) or transfected with vector only or GFP-AA-TFEB. ATP content in cell lysates was analyzed 48 h post-transfection.

Data information: Data are mean ± SD, n = 3. \* denotes P < 0.05 using Student's t-test analysis.
